# Supplementary material
Source: MDPI journal article supplement (https://www.mdpi.com/1999-4907/11/7/730)
Supplement: s1 [file s1]

## Supplementary

### Partly changed species composition

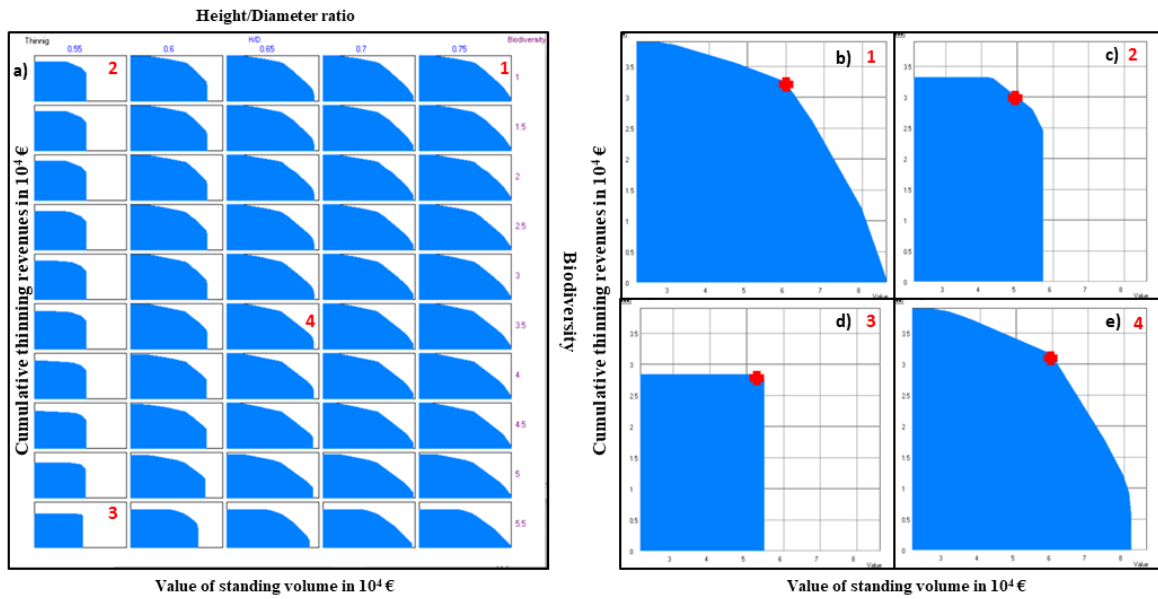

**Figure S1. a)** IDM is representing a trade-off between the value of standing volume and cumulative revenues from thinning at a specific level of H/D and B index for RST with partly changed species composition. Blue part representing the set of the feasible solutions which contain Pareto optimal solution on the hull. b) IDM which will be probably chosen by the economically oriented risk-seeking owner, c) IDM probably selected by economically oriented risk-avoiding owner, d) IDM suitable for nature-oriented DM and e) IDM, which is likely to be chosen by the balanced owner.

### Native species composition

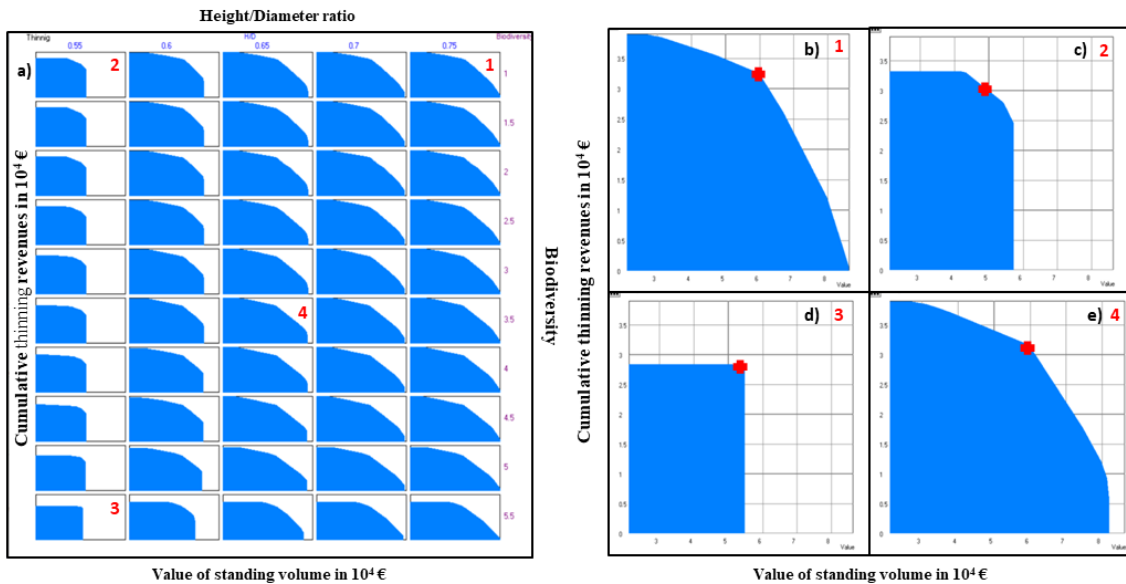

**Figure S2. a)** IDM is representing a trade-off between the value of standing volume and cumulative revenues from thinning at a specific level of H/D and B index for RST with native species composition. Blue part representing the set of the feasible solutions which contain Pareto optimal solution on the hull. b) IDM which

will be probably chosen by the economically oriented risk-seeking owner, c) IDM probably selected by economically oriented risk-avoiding owner, d) IDM suitable for nature-oriented DM and e) IDM, which is likely to be chosen by the balanced owner.
